# Supplementary material
Source: MDPI journal article supplement (https://www.mdpi.com/2073-4352/13/2/255)
Supplement: s1 [file s1]

*Supplementary Materials*

**Table S1.** Atomic Mulliken charges populations of pure and Ce-doped BaTiO<sub>3</sub>

| Compound                                                 | Spilling | Species | s    | p    | d    | f    | Total | Mulliken charge |
|----------------------------------------------------------|----------|---------|------|------|------|------|-------|-----------------|
| BaTiO <sub>3</sub>                                       | 0.15     | Ba      | 2.06 | 5.82 | 0.68 | 0.00 | 8.56  | 1.44            |
|                                                          |          | Ti      | 2.38 | 6.80 | 2.08 | 0.00 | 11.26 | 0.74            |
|                                                          |          | O1      | 1.84 | 4.86 | 0.00 | 0.00 | 6.70  | -0.70           |
|                                                          |          | O2      | 1.84 | 4.90 | 0.00 | 0.00 | 6.74  | -0.74           |
|                                                          |          | O3      | 1.84 | 4.90 | 0.00 | 0.00 | 6.74  | -0.74           |
| Ba <sub>0.875</sub> Ce <sub>0.125</sub> TiO <sub>3</sub> | 0.15     | Ba1     | 2.06 | 5.80 | 0.70 | 0.00 | 8.56  | 1.44            |
|                                                          |          | Ba2     | 2.06 | 5.80 | 0.70 | 0.00 | 8.56  | 1.44            |
|                                                          |          | Ba3     | 2.08 | 5.82 | 0.68 | 0.00 | 8.58  | 1.42            |
|                                                          |          | Ba4     | 2.06 | 5.80 | 0.70 | 0.00 | 8.56  | 1.44            |
|                                                          |          | Ba5     | 2.08 | 5.82 | 0.68 | 0.00 | 8.58  | 1.42            |
|                                                          |          | Ba6     | 2.08 | 5.82 | 0.68 | 0.00 | 8.58  | 1.42            |
|                                                          |          | Ba7     | 2.08 | 5.82 | 0.70 | 0.00 | 8.60  | 1.40            |
|                                                          |          | Ti1     | 2.38 | 6.80 | 2.08 | 0.00 | 11.26 | 0.74            |
|                                                          |          | Ti2     | 2.38 | 6.80 | 2.08 | 0.00 | 11.26 | 0.74            |
|                                                          |          | Ti3     | 2.38 | 6.80 | 2.08 | 0.00 | 11.26 | 0.74            |
|                                                          |          | Ti4     | 2.38 | 6.80 | 2.08 | 0.00 | 11.26 | 0.74            |
|                                                          |          | Ti5     | 2.38 | 6.80 | 2.08 | 0.00 | 11.26 | 0.74            |
|                                                          |          | Ti6     | 2.38 | 6.80 | 2.08 | 0.00 | 11.26 | 0.74            |
|                                                          |          | Ti7     | 2.38 | 6.80 | 2.08 | 0.00 | 11.26 | 0.74            |
|                                                          |          | Ti8     | 2.38 | 6.80 | 2.08 | 0.00 | 11.26 | 0.74            |
|                                                          |          | Ce      | 2.20 | 6.05 | 1.10 | 1.10 | 10.45 | 1.55            |
|                                                          |          | O1      | 1.84 | 4.88 | 0.00 | 0.00 | 6.72  | -0.72           |
|                                                          |          | O2      | 1.84 | 4.88 | 0.00 | 0.00 | 6.72  | -0.72           |
|                                                          |          | O3      | 1.84 | 4.88 | 0.00 | 0.00 | 6.72  | -0.72           |
|                                                          |          | O4      | 1.84 | 4.88 | 0.00 | 0.00 | 6.72  | -0.72           |
|                                                          |          | O5      | 1.84 | 4.88 | 0.00 | 0.00 | 6.72  | -0.72           |
|                                                          |          | O6      | 1.84 | 4.88 | 0.00 | 0.00 | 6.72  | -0.72           |
|                                                          |          | O7      | 1.84 | 4.88 | 0.00 | 0.00 | 6.72  | -0.72           |
|                                                          |          | O8      | 1.84 | 4.89 | 0.00 | 0.00 | 6.73  | -0.73           |
|                                                          |          | O9      | 1.84 | 4.88 | 0.00 | 0.00 | 6.72  | -0.72           |
|                                                          |          | O10     | 1.84 | 4.89 | 0.00 | 0.00 | 6.73  | -0.73           |
|                                                          |          | O11     | 1.84 | 4.88 | 0.00 | 0.00 | 6.72  | -0.72           |
|                                                          |          | O12     | 1.84 | 4.89 | 0.00 | 0.00 | 6.73  | -0.73           |
|                                                          |          | O13     | 1.84 | 4.88 | 0.00 | 0.00 | 6.72  | -0.72           |
|                                                          |          | O14     | 1.84 | 4.89 | 0.00 | 0.00 | 6.73  | -0.73           |
|                                                          |          | O15     | 1.84 | 4.88 | 0.00 | 0.00 | 6.72  | -0.72           |
|                                                          |          | O16     | 1.84 | 4.89 | 0.00 | 0.00 | 6.73  | -0.73           |
|                                                          |          | O17     | 1.84 | 4.89 | 0.00 | 0.00 | 6.73  | -0.73           |
|                                                          |          | O18     | 1.84 | 4.90 | 0.00 | 0.00 | 6.74  | -0.74           |
|                                                          |          | O19     | 1.84 | 4.89 | 0.00 | 0.00 | 6.73  | -0.73           |
|                                                          |          | O20     | 1.84 | 4.90 | 0.00 | 0.00 | 6.74  | -0.74           |
|                                                          |          | O21     | 1.84 | 4.89 | 0.00 | 0.00 | 6.73  | -0.73           |
|                                                          |          | O22     | 1.84 | 4.90 | 0.00 | 0.00 | 6.74  | -0.74           |
|                                                          |          | O23     | 1.84 | 4.89 | 0.00 | 0.00 | 6.73  | -0.73           |

|  |  |     |      |      |      |      |       |       |
|--|--|-----|------|------|------|------|-------|-------|
|  |  | O24 | 1.84 | 4.90 | 0.00 | 0.00 | 6.74  | -0.74 |
|  |  | Ba1 | 2.06 | 5.88 | 0.69 | 0.00 | 8.63  | 1.37  |
|  |  | Ba2 | 2.06 | 5.88 | 0.67 | 0.00 | 8.61  | 1.39  |
|  |  | Ba3 | 2.06 | 5.88 | 0.69 | 0.00 | 8.63  | 1.37  |
|  |  | Ba4 | 2.06 | 5.88 | 0.67 | 0.00 | 8.61  | 1.39  |
|  |  | Ba5 | 2.06 | 5.88 | 0.69 | 0.00 | 8.63  | 1.37  |
|  |  | Ba6 | 2.06 | 5.88 | 0.67 | 0.00 | 8.61  | 1.39  |
|  |  | Ba7 | 2.06 | 5.88 | 0.68 | 0.00 | 8.62  | 1.38  |
|  |  | Ba8 | 2.06 | 5.88 | 0.66 | 0.00 | 8.60  | 1.40  |
|  |  | Ti1 | 2.36 | 6.78 | 2.08 | 0.00 | 11.22 | 0.78  |
|  |  | Ti2 | 2.36 | 6.78 | 2.08 | 0.00 | 11.22 | 0.78  |
|  |  | Ti3 | 2.36 | 6.78 | 2.08 | 0.00 | 11.22 | 0.78  |
|  |  | Ti4 | 2.36 | 6.78 | 2.08 | 0.00 | 11.22 | 0.78  |
|  |  | Ti5 | 2.40 | 6.78 | 2.02 | 0.00 | 11.20 | 0.80  |
|  |  | Ti6 | 2.38 | 6.80 | 2.08 | 0.00 | 11.26 | 0.74  |
|  |  | Ti7 | 2.38 | 6.78 | 2.08 | 0.00 | 11.24 | 0.76  |
|  |  | Ce  | 2.26 | 6.22 | 1.78 | 0.82 | 11.08 | 0.92  |
|  |  | O1  | 1.86 | 4.84 | 0.00 | 0.00 | 6.70  | -0.70 |
|  |  | O2  | 1.86 | 4.86 | 0.00 | 0.00 | 6.72  | -0.72 |
|  |  | O3  | 1.86 | 4.84 | 0.00 | 0.00 | 6.70  | -0.70 |
|  |  | O4  | 1.86 | 4.86 | 0.00 | 0.00 | 6.72  | -0.72 |
|  |  | O5  | 1.84 | 4.90 | 0.00 | 0.00 | 6.74  | -0.74 |
|  |  | O6  | 1.84 | 4.90 | 0.00 | 0.00 | 6.74  | -0.74 |
|  |  | O7  | 1.84 | 4.90 | 0.00 | 0.00 | 6.74  | -0.74 |
|  |  | O8  | 1.84 | 4.90 | 0.00 | 0.00 | 6.74  | -0.74 |
|  |  | O9  | 1.84 | 4.90 | 0.00 | 0.00 | 6.74  | -0.74 |
|  |  | O10 | 1.84 | 4.90 | 0.00 | 0.00 | 6.74  | -0.74 |
|  |  | O11 | 1.84 | 4.90 | 0.00 | 0.00 | 6.74  | -0.74 |
|  |  | O12 | 1.84 | 4.90 | 0.00 | 0.00 | 6.74  | -0.74 |
|  |  | O13 | 1.84 | 4.90 | 0.00 | 0.00 | 6.74  | -0.74 |
|  |  | O14 | 1.84 | 4.86 | 0.00 | 0.00 | 6.70  | -0.70 |
|  |  | O15 | 1.84 | 4.90 | 0.00 | 0.00 | 6.74  | -0.74 |
|  |  | O16 | 1.84 | 4.86 | 0.00 | 0.00 | 6.70  | -0.70 |
|  |  | O17 | 1.84 | 4.90 | 0.00 | 0.00 | 6.74  | -0.74 |
|  |  | O18 | 1.84 | 4.86 | 0.00 | 0.00 | 6.70  | -0.70 |
|  |  | O19 | 1.84 | 4.90 | 0.00 | 0.00 | 6.74  | -0.74 |
|  |  | O20 | 1.84 | 4.86 | 0.00 | 0.00 | 6.70  | -0.70 |
|  |  | O21 | 1.84 | 4.88 | 0.00 | 0.00 | 6.72  | -0.72 |
|  |  | O22 | 1.85 | 4.88 | 0.00 | 0.00 | 6.73  | -0.73 |
|  |  | O23 | 1.86 | 4.86 | 0.00 | 0.00 | 6.72  | -0.72 |
|  |  | O24 | 1.85 | 4.86 | 0.00 | 0.00 | 6.71  | -0.71 |

**Table S2.** Bond overlap populations of pure and Ce-doped BaTiO<sub>3</sub>

| Compound                                                 | Bond     | Population |
|----------------------------------------------------------|----------|------------|
| BaTiO <sub>3</sub>                                       | Ba1--O2  | -0.14      |
|                                                          | Ba1--O3  | -0.14      |
|                                                          | Ba1--O1  | -0.07      |
|                                                          | Ti1--O1  | 1.01       |
|                                                          | Ti1--O2  | 1.15       |
|                                                          | Ti1--O3  | 1.15       |
| Ba <sub>0.875</sub> Ce <sub>0.125</sub> TiO <sub>3</sub> | O15--Ba1 | -0.14      |
|                                                          | O13--Ba1 | -0.14      |
|                                                          | O11--Ba1 | -0.14      |
|                                                          | O9--Ba1  | -0.14      |
|                                                          | O14--Ba4 | -0.13      |
|                                                          | O12--Ba2 | -0.13      |
|                                                          | O10--Ba2 | -0.13      |
|                                                          | O16--Ba4 | -0.13      |
|                                                          | O13--Ba4 | -0.12      |
|                                                          | O11--Ba2 | -0.12      |
|                                                          | O9--Ba2  | -0.12      |
|                                                          | O15--Ba4 | -0.12      |
|                                                          | O6--Ba4  | -0.12      |
|                                                          | O2--Ba4  | -0.12      |
|                                                          | O8--Ba4  | -0.12      |
|                                                          | O8--Ba2  | -0.12      |
|                                                          | O4--Ba4  | -0.12      |
|                                                          | O2--Ba2  | -0.12      |
|                                                          | O6--Ba2  | -0.12      |
|                                                          | O4--Ba2  | -0.12      |
|                                                          | O17--Ba7 | -0.12      |
|                                                          | O23--Ba7 | -0.12      |
|                                                          | O21--Ba7 | -0.12      |
|                                                          | O19--Ba7 | -0.12      |
|                                                          | O13--Ba5 | -0.12      |
|                                                          | O11--Ba3 | -0.12      |
|                                                          | O9--Ba3  | -0.12      |
|                                                          | O15--Ba5 | -0.12      |
|                                                          | O16--Ba1 | -0.11      |
|                                                          | O14--Ba1 | -0.11      |
|                                                          | O12--Ba1 | -0.11      |
|                                                          | O10--Ba1 | -0.11      |
|                                                          | O19--Ba3 | -0.11      |
|                                                          | O23--Ba5 | -0.11      |
|                                                          | O21--Ba5 | -0.11      |
|                                                          | O17--Ba3 | -0.11      |
|                                                          | O6--Ba6  | -0.11      |
|                                                          | O2--Ba6  | -0.11      |
|                                                          | O8--Ba6  | -0.11      |
|                                                          | O4--Ba6  | -0.11      |
|                                                          | O5--Ba7  | -0.1       |

|  |          |       |
|--|----------|-------|
|  | O1--Ba7  | -0.1  |
|  | O7--Ba7  | -0.1  |
|  | O3--Ba7  | -0.1  |
|  | O24--Ba4 | -0.1  |
|  | O22--Ba4 | -0.1  |
|  | O20--Ba2 | -0.1  |
|  | O18--Ba2 | -0.1  |
|  | O18--Ba6 | -0.1  |
|  | O24--Ba6 | -0.1  |
|  | O22--Ba6 | -0.1  |
|  | O20--Ba6 | -0.1  |
|  | O19--Ba2 | -0.09 |
|  | O23--Ba4 | -0.09 |
|  | O21--Ba4 | -0.09 |
|  | O17--Ba2 | -0.09 |
|  | O17--Ba6 | -0.09 |
|  | O23--Ba6 | -0.09 |
|  | O21--Ba6 | -0.09 |
|  | O19--Ba6 | -0.09 |
|  | O7--Ba1  | -0.09 |
|  | O5--Ba1  | -0.09 |
|  | O3--Ba1  | -0.09 |
|  | O1--Ba1  | -0.09 |
|  | O5--Ba5  | -0.09 |
|  | O1--Ba5  | -0.09 |
|  | O7--Ba3  | -0.09 |
|  | O5--Ba3  | -0.09 |
|  | O3--Ba3  | -0.09 |
|  | O1--Ba3  | -0.09 |
|  | O7--Ba5  | -0.09 |
|  | O3--Ba5  | -0.09 |
|  | O14--Ba5 | -0.09 |
|  | O12--Ba3 | -0.09 |
|  | O10--Ba3 | -0.09 |
|  | O16--Ba5 | -0.09 |
|  | O24--Ba5 | -0.08 |
|  | O22--Ba5 | -0.08 |
|  | O20--Ba3 | -0.08 |
|  | O18--Ba3 | -0.08 |
|  | O18--Ba7 | -0.08 |
|  | O24--Ba7 | -0.08 |
|  | O22--Ba7 | -0.08 |
|  | O20--Ba7 | -0.08 |
|  | O16--Ce1 | -0.03 |
|  | O14--Ce1 | -0.03 |
|  | O12--Ce1 | -0.03 |
|  | O10--Ce1 | -0.03 |
|  | O8--Ti4  | 0     |
|  | O8--Ti2  | 0     |

|  |          |   |
|--|----------|---|
|  | O6--Ti2  | 0 |
|  | O4--Ti8  | 0 |
|  | O4--Ti6  | 0 |
|  | O2--Ti8  | 0 |
|  | O2--Ti6  | 0 |
|  | O6--Ti4  | 0 |
|  | O23--Ti8 | 0 |
|  | O23--Ti2 | 0 |
|  | O21--Ti6 | 0 |
|  | O19--Ti8 | 0 |
|  | O19--Ti4 | 0 |
|  | O17--Ti6 | 0 |
|  | O17--Ti2 | 0 |
|  | O21--Ti4 | 0 |
|  | O16--Ti2 | 0 |
|  | O12--Ti2 | 0 |
|  | O16--Ti6 | 0 |
|  | O14--Ti8 | 0 |
|  | O14--Ti4 | 0 |
|  | O12--Ti8 | 0 |
|  | O10--Ti6 | 0 |
|  | O10--Ti4 | 0 |
|  | O7--Ti3  | 0 |
|  | O5--Ti3  | 0 |
|  | O5--Ti1  | 0 |
|  | O3--Ti7  | 0 |
|  | O3--Ti5  | 0 |
|  | O7--Ti1  | 0 |
|  | O1--Ti7  | 0 |
|  | O1--Ti5  | 0 |
|  | O22--Ti5 | 0 |
|  | O24--Ti7 | 0 |
|  | O24--Ti1 | 0 |
|  | O22--Ti3 | 0 |
|  | O20--Ti7 | 0 |
|  | O20--Ti3 | 0 |
|  | O18--Ti5 | 0 |
|  | O18--Ti1 | 0 |
|  | O16--Ti7 | 0 |
|  | O16--Ti3 | 0 |
|  | O14--Ti5 | 0 |
|  | O14--Ti1 | 0 |
|  | O12--Ti5 | 0 |
|  | O12--Ti3 | 0 |
|  | O10--Ti7 | 0 |
|  | O10--Ti1 | 0 |
|  | O24--Ti6 | 0 |
|  | O24--Ti4 | 0 |
|  | O22--Ti2 | 0 |

|  |          |   |
|--|----------|---|
|  | O20--Ti6 | 0 |
|  | O20--Ti2 | 0 |
|  | O18--Ti8 | 0 |
|  | O18--Ti4 | 0 |
|  | O22--Ti8 | 0 |
|  | O19--Ti5 | 0 |
|  | O19--Ti1 | 0 |
|  | O23--Ti5 | 0 |
|  | O23--Ti3 | 0 |
|  | O21--Ti7 | 0 |
|  | O21--Ti1 | 0 |
|  | O17--Ti7 | 0 |
|  | O17--Ti3 | 0 |
|  | O15--Ti2 | 0 |
|  | O13--Ti8 | 0 |
|  | O11--Ti2 | 0 |
|  | O9--Ti6  | 0 |
|  | O9--Ti4  | 0 |
|  | O15--Ti6 | 0 |
|  | O13--Ti4 | 0 |
|  | O11--Ti8 | 0 |
|  | O8--Ti6  | 0 |
|  | O6--Ti8  | 0 |
|  | O4--Ti2  | 0 |
|  | O2--Ti4  | 0 |
|  | O23--Ti6 | 0 |
|  | O23--Ti4 | 0 |
|  | O21--Ti2 | 0 |
|  | O19--Ti6 | 0 |
|  | O19--Ti2 | 0 |
|  | O17--Ti8 | 0 |
|  | O17--Ti4 | 0 |
|  | O21--Ti8 | 0 |
|  | O8--Ti5  | 0 |
|  | O6--Ti7  | 0 |
|  | O4--Ti1  | 0 |
|  | O2--Ti3  | 0 |
|  | O7--Ti5  | 0 |
|  | O5--Ti7  | 0 |
|  | O3--Ti1  | 0 |
|  | O1--Ti3  | 0 |
|  | O16--Ti5 | 0 |
|  | O16--Ti1 | 0 |
|  | O14--Ti7 | 0 |
|  | O14--Ti3 | 0 |
|  | O12--Ti7 | 0 |
|  | O12--Ti1 | 0 |
|  | O10--Ti5 | 0 |
|  | O10--Ti3 | 0 |

|  |          |      |
|--|----------|------|
|  | O22--Ti1 | 0    |
|  | O24--Ti5 | 0    |
|  | O24--Ti3 | 0    |
|  | O22--Ti7 | 0    |
|  | O20--Ti5 | 0    |
|  | O20--Ti1 | 0    |
|  | O18--Ti7 | 0    |
|  | O18--Ti3 | 0    |
|  | O7--Ti6  | 0    |
|  | O5--Ti8  | 0    |
|  | O3--Ti2  | 0    |
|  | O1--Ti4  | 0    |
|  | O15--Ti8 | 0.01 |
|  | O15--Ti4 | 0.01 |
|  | O13--Ti6 | 0.01 |
|  | O13--Ti2 | 0.01 |
|  | O11--Ti6 | 0.01 |
|  | O11--Ti4 | 0.01 |
|  | O9--Ti8  | 0.01 |
|  | O9--Ti2  | 0.01 |
|  | O15--Ti5 | 0.01 |
|  | O13--Ti7 | 0.01 |
|  | O13--Ti3 | 0.01 |
|  | O11--Ti1 | 0.01 |
|  | O9--Ti3  | 0.01 |
|  | O15--Ti1 | 0.01 |
|  | O11--Ti7 | 0.01 |
|  | O9--Ti5  | 0.01 |
|  | O8--Ti3  | 0.01 |
|  | O8--Ti1  | 0.01 |
|  | O6--Ti3  | 0.01 |
|  | O6--Ti1  | 0.01 |
|  | O4--Ti7  | 0.01 |
|  | O4--Ti5  | 0.01 |
|  | O2--Ti7  | 0.01 |
|  | O2--Ti5  | 0.01 |
|  | O7--Ti4  | 0.01 |
|  | O7--Ti2  | 0.01 |
|  | O5--Ti4  | 0.01 |
|  | O5--Ti2  | 0.01 |
|  | O3--Ti8  | 0.01 |
|  | O3--Ti6  | 0.01 |
|  | O1--Ti8  | 0.01 |
|  | O1--Ti6  | 0.01 |
|  | O8--Ce1  | 0.04 |
|  | O6--Ce1  | 0.04 |
|  | O4--Ce1  | 0.04 |
|  | O2--Ce1  | 0.04 |
|  | O7--Ce1  | 0.06 |

|  |          |      |
|--|----------|------|
|  | O5--Ce1  | 0.06 |
|  | O3--Ce1  | 0.06 |
|  | O1--Ce1  | 0.06 |
|  | O8--Ba1  | 0.06 |
|  | O6--Ba1  | 0.06 |
|  | O4--Ba1  | 0.06 |
|  | O2--Ba1  | 0.06 |
|  | O21--Ce1 | 0.06 |
|  | O19--Ce1 | 0.06 |
|  | O17--Ce1 | 0.06 |
|  | O23--Ce1 | 0.06 |
|  | O9--Ba4  | 0.06 |
|  | O13--Ba2 | 0.06 |
|  | O11--Ba4 | 0.06 |
|  | O15--Ba2 | 0.06 |
|  | O12--Ba4 | 0.06 |
|  | O10--Ba4 | 0.06 |
|  | O16--Ba2 | 0.06 |
|  | O14--Ba2 | 0.06 |
|  | O14--Ba7 | 0.06 |
|  | O12--Ba7 | 0.06 |
|  | O10--Ba7 | 0.06 |
|  | O16--Ba7 | 0.06 |
|  | O22--Ce1 | 0.06 |
|  | O18--Ce1 | 0.06 |
|  | O24--Ce1 | 0.06 |
|  | O20--Ce1 | 0.06 |
|  | O8--Ba5  | 0.07 |
|  | O8--Ba3  | 0.07 |
|  | O6--Ba5  | 0.07 |
|  | O6--Ba3  | 0.07 |
|  | O4--Ba5  | 0.07 |
|  | O4--Ba3  | 0.07 |
|  | O2--Ba5  | 0.07 |
|  | O2--Ba3  | 0.07 |
|  | O5--Ba4  | 0.07 |
|  | O3--Ba2  | 0.07 |
|  | O1--Ba4  | 0.07 |
|  | O7--Ba4  | 0.07 |
|  | O7--Ba2  | 0.07 |
|  | O5--Ba2  | 0.07 |
|  | O3--Ba4  | 0.07 |
|  | O1--Ba2  | 0.07 |
|  | O5--Ba6  | 0.07 |
|  | O1--Ba6  | 0.07 |
|  | O7--Ba6  | 0.07 |
|  | O3--Ba6  | 0.07 |
|  | O12--Ba5 | 0.07 |
|  | O10--Ba5 | 0.07 |



|  |          |      |
|--|----------|------|
|  | O16--Ba3 | 0.07 |
|  | O14--Ba3 | 0.07 |
|  | O21--Ba2 | 0.07 |
|  | O17--Ba4 | 0.07 |
|  | O23--Ba2 | 0.07 |
|  | O19--Ba4 | 0.07 |
|  | O13--Ba6 | 0.07 |
|  | O11--Ba6 | 0.07 |
|  | O9--Ba6  | 0.07 |
|  | O15--Ba6 | 0.07 |
|  | O22--Ba1 | 0.07 |
|  | O24--Ba1 | 0.07 |
|  | O20--Ba1 | 0.07 |
|  | O18--Ba1 | 0.07 |
|  | O22--Ba3 | 0.07 |
|  | O18--Ba5 | 0.07 |
|  | O24--Ba3 | 0.07 |
|  | O20--Ba5 | 0.07 |
|  | O6--Ba7  | 0.07 |
|  | O2--Ba7  | 0.07 |
|  | O8--Ba7  | 0.07 |
|  | O4--Ba7  | 0.07 |
|  | O24--Ba2 | 0.07 |
|  | O22--Ba2 | 0.07 |
|  | O18--Ba4 | 0.07 |
|  | O20--Ba4 | 0.07 |
|  | O12--Ba6 | 0.07 |
|  | O10--Ba6 | 0.07 |
|  | O16--Ba6 | 0.07 |
|  | O14--Ba6 | 0.07 |
|  | O21--Ba1 | 0.07 |
|  | O19--Ba1 | 0.07 |
|  | O23--Ba1 | 0.07 |
|  | O17--Ba1 | 0.07 |
|  | O9--Ba5  | 0.07 |
|  | O13--Ba3 | 0.07 |
|  | O11--Ba5 | 0.07 |
|  | O15--Ba3 | 0.07 |
|  | O21--Ba3 | 0.07 |
|  | O17--Ba5 | 0.07 |
|  | O23--Ba3 | 0.07 |
|  | O19--Ba5 | 0.07 |
|  | O13--Ba7 | 0.07 |
|  | O11--Ba7 | 0.07 |
|  | O9--Ba7  | 0.07 |
|  | O15--Ba7 | 0.07 |
|  | O15--Ce1 | 0.08 |
|  | O13--Ce1 | 0.08 |
|  | O11--Ce1 | 0.08 |

|  |          |      |
|--|----------|------|
|  | O9--Ce1  | 0.08 |
|  | O8--Ti7  | 0.43 |
|  | O6--Ti5  | 0.43 |
|  | O4--Ti3  | 0.43 |
|  | O2--Ti1  | 0.43 |
|  | O7--Ti8  | 0.44 |
|  | O5--Ti6  | 0.44 |
|  | O3--Ti4  | 0.44 |
|  | O1--Ti2  | 0.44 |
|  | O15--Ti7 | 0.51 |
|  | O15--Ti3 | 0.51 |
|  | O13--Ti5 | 0.51 |
|  | O13--Ti1 | 0.51 |
|  | O11--Ti5 | 0.51 |
|  | O11--Ti3 | 0.51 |
|  | O9--Ti7  | 0.51 |
|  | O9--Ti1  | 0.51 |
|  | O22--Ti6 | 0.55 |
|  | O24--Ti8 | 0.55 |
|  | O24--Ti2 | 0.55 |
|  | O20--Ti8 | 0.55 |
|  | O20--Ti4 | 0.55 |
|  | O18--Ti6 | 0.55 |
|  | O18--Ti2 | 0.55 |
|  | O22--Ti4 | 0.55 |
|  | O16--Ti8 | 0.56 |
|  | O16--Ti4 | 0.56 |
|  | O14--Ti6 | 0.56 |
|  | O14--Ti2 | 0.56 |
|  | O12--Ti6 | 0.56 |
|  | O12--Ti4 | 0.56 |
|  | O10--Ti8 | 0.56 |
|  | O10--Ti2 | 0.56 |
|  | O21--Ti5 | 0.57 |
|  | O23--Ti7 | 0.57 |
|  | O19--Ti3 | 0.57 |
|  | O17--Ti1 | 0.57 |
|  | O23--Ti1 | 0.57 |
|  | O21--Ti3 | 0.57 |
|  | O19--Ti7 | 0.57 |
|  | O17--Ti5 | 0.57 |
|  | O6--Ti6  | 0.61 |
|  | O4--Ti4  | 0.61 |
|  | O8--Ti8  | 0.61 |
|  | O2--Ti2  | 0.61 |
|  | O7--Ti7  | 0.64 |
|  | O5--Ti5  | 0.64 |
|  | O3--Ti3  | 0.64 |
|  | O1--Ti1  | 0.64 |

|                                                          |          |       |
|----------------------------------------------------------|----------|-------|
| BaTi <sub>0.875</sub> Ce <sub>0.125</sub> O <sub>3</sub> | O20--Ba1 | -0.12 |
|                                                          | O18--Ba5 | -0.12 |
|                                                          | O16--Ba7 | -0.12 |
|                                                          | O14--Ba1 | -0.12 |
|                                                          | O20--Ba7 | -0.12 |
|                                                          | O18--Ba3 | -0.12 |
|                                                          | O16--Ba3 | -0.12 |
|                                                          | O14--Ba5 | -0.12 |
|                                                          | O11--Ba8 | -0.11 |
|                                                          | O9--Ba6  | -0.11 |
|                                                          | O7--Ba4  | -0.11 |
|                                                          | O5--Ba2  | -0.11 |
|                                                          | O11--Ba4 | -0.11 |
|                                                          | O9--Ba2  | -0.11 |
|                                                          | O7--Ba6  | -0.11 |
|                                                          | O5--Ba8  | -0.11 |
|                                                          | O19--Ba8 | -0.1  |
|                                                          | O17--Ba4 | -0.1  |
|                                                          | O15--Ba4 | -0.1  |
|                                                          | O13--Ba6 | -0.1  |
|                                                          | O19--Ba2 | -0.1  |
|                                                          | O17--Ba6 | -0.1  |
|                                                          | O15--Ba8 | -0.1  |
|                                                          | O13--Ba2 | -0.1  |
|                                                          | O20--Ba8 | -0.09 |
|                                                          | O18--Ba4 | -0.09 |
|                                                          | O16--Ba4 | -0.09 |
|                                                          | O14--Ba6 | -0.09 |
|                                                          | O20--Ba2 | -0.09 |
|                                                          | O18--Ba6 | -0.09 |
|                                                          | O16--Ba8 | -0.09 |
|                                                          | O14--Ba2 | -0.09 |
|                                                          | O21--Ba4 | -0.09 |
|                                                          | O21--Ba8 | -0.09 |
|                                                          | O21--Ba6 | -0.09 |
|                                                          | O21--Ba2 | -0.09 |
|                                                          | O10--Ba5 | -0.09 |
|                                                          | O8--Ba3  | -0.09 |
|                                                          | O12--Ba3 | -0.09 |
|                                                          | O6--Ba7  | -0.09 |
|                                                          | O12--Ba7 | -0.09 |
|                                                          | O6--Ba1  | -0.09 |
|                                                          | O10--Ba1 | -0.09 |

|  |          |       |
|--|----------|-------|
|  | O8--Ba5  | -0.09 |
|  | O22--Ba7 | -0.08 |
|  | O22--Ba3 | -0.08 |
|  | O22--Ba1 | -0.08 |
|  | O22--Ba5 | -0.08 |
|  | O24--Ba3 | -0.07 |
|  | O24--Ba5 | -0.07 |
|  | O24--Ba7 | -0.07 |
|  | O24--Ba1 | -0.07 |
|  | O19--Ba1 | -0.06 |
|  | O17--Ba5 | -0.06 |
|  | O15--Ba7 | -0.06 |
|  | O13--Ba1 | -0.06 |
|  | O19--Ba7 | -0.06 |
|  | O17--Ba3 | -0.06 |
|  | O15--Ba3 | -0.06 |
|  | O13--Ba5 | -0.06 |
|  | O4--Ba5  | -0.06 |
|  | O4--Ba3  | -0.06 |
|  | O2--Ba7  | -0.06 |
|  | O2--Ba1  | -0.06 |
|  | O2--Ba3  | -0.06 |
|  | O4--Ba1  | -0.06 |
|  | O2--Ba5  | -0.06 |
|  | O4--Ba7  | -0.06 |
|  | O9--Ba5  | -0.05 |
|  | O7--Ba3  | -0.05 |
|  | O11--Ba3 | -0.05 |
|  | O5--Ba7  | -0.05 |
|  | O11--Ba7 | -0.05 |
|  | O5--Ba1  | -0.05 |
|  | O9--Ba1  | -0.05 |
|  | O7--Ba5  | -0.05 |
|  | O23--Ba6 | -0.04 |
|  | O23--Ba4 | -0.04 |
|  | O23--Ba2 | -0.04 |
|  | O23--Ba8 | -0.04 |
|  | O3--Ba4  | -0.04 |
|  | O1--Ba6  | -0.04 |
|  | O3--Ba6  | -0.04 |
|  | O1--Ba2  | -0.04 |
|  | O3--Ba8  | -0.04 |
|  | O1--Ba4  | -0.04 |

|  |          |       |
|--|----------|-------|
|  | O3--Ba2  | -0.04 |
|  | O1--Ba8  | -0.04 |
|  | O12--Ba8 | -0.04 |
|  | O10--Ba6 | -0.04 |
|  | O8--Ba4  | -0.04 |
|  | O6--Ba2  | -0.04 |
|  | O12--Ba4 | -0.04 |
|  | O10--Ba2 | -0.04 |
|  | O8--Ba6  | -0.04 |
|  | O6--Ba8  | -0.04 |
|  | O4--Ce1  | -0.04 |
|  | O2--Ce1  | -0.04 |
|  | O8--Ce1  | -0.04 |
|  | O12--Ce1 | -0.04 |
|  | O10--Ce1 | -0.04 |
|  | O6--Ce1  | -0.04 |
|  | O3--Ce1  | -0.02 |
|  | O1--Ce1  | -0.02 |
|  | O21--Ti3 | -0.01 |
|  | O21--Ti1 | -0.01 |
|  | O1--Ti6  | -0.01 |
|  | O3--Ti6  | -0.01 |
|  | O23--Ti1 | -0.01 |
|  | O23--Ti3 | -0.01 |
|  | O2--Ti7  | -0.01 |
|  | O4--Ti7  | -0.01 |
|  | O24--Ti2 | -0.01 |
|  | O24--Ti4 | -0.01 |
|  | O3--Ti5  | -0.01 |
|  | O1--Ti5  | -0.01 |
|  | O22--Ti4 | -0.01 |
|  | O22--Ti2 | -0.01 |
|  | O20--Ti2 | -0.01 |
|  | O18--Ti2 | -0.01 |
|  | O16--Ti4 | -0.01 |
|  | O14--Ti4 | -0.01 |
|  | O15--Ce1 | -0.01 |
|  | O19--Ce1 | -0.01 |
|  | O17--Ce1 | -0.01 |
|  | O13--Ce1 | -0.01 |
|  | O24--Ti5 | -0.01 |
|  | O20--Ti3 | 0     |
|  | O18--Ti3 | 0     |

|  |          |   |
|--|----------|---|
|  | O16--Ti1 | 0 |
|  | O14--Ti1 | 0 |
|  | O19--Ti4 | 0 |
|  | O17--Ti4 | 0 |
|  | O15--Ti2 | 0 |
|  | O13--Ti2 | 0 |
|  | O11--Ti4 | 0 |
|  | O9--Ti4  | 0 |
|  | O7--Ti2  | 0 |
|  | O5--Ti2  | 0 |
|  | O18--Ti7 | 0 |
|  | O16--Ti7 | 0 |
|  | O14--Ti7 | 0 |
|  | O20--Ti7 | 0 |
|  | O8--Ti4  | 0 |
|  | O12--Ti2 | 0 |
|  | O10--Ti2 | 0 |
|  | O6--Ti4  | 0 |
|  | O15--Ti6 | 0 |
|  | O17--Ti6 | 0 |
|  | O13--Ti6 | 0 |
|  | O19--Ti6 | 0 |
|  | O9--Ti1  | 0 |
|  | O7--Ti3  | 0 |
|  | O11--Ti1 | 0 |
|  | O5--Ti3  | 0 |
|  | O7--Ti5  | 0 |
|  | O11--Ti5 | 0 |
|  | O5--Ti5  | 0 |
|  | O9--Ti5  | 0 |
|  | O15--Ti3 | 0 |
|  | O13--Ti3 | 0 |
|  | O19--Ti1 | 0 |
|  | O17--Ti1 | 0 |
|  | O12--Ti3 | 0 |
|  | O10--Ti3 | 0 |
|  | O8--Ti1  | 0 |
|  | O6--Ti1  | 0 |
|  | O4--Ti5  | 0 |
|  | O2--Ti5  | 0 |
|  | O16--Ti5 | 0 |
|  | O20--Ti5 | 0 |
|  | O18--Ti5 | 0 |

|  |          |   |
|--|----------|---|
|  | O14--Ti5 | 0 |
|  | O1--Ti7  | 0 |
|  | O3--Ti7  | 0 |
|  | O21--Ti4 | 0 |
|  | O21--Ti2 | 0 |
|  | O16--Ti6 | 0 |
|  | O14--Ti6 | 0 |
|  | O18--Ti6 | 0 |
|  | O20--Ti6 | 0 |
|  | O3--Ti1  | 0 |
|  | O1--Ti3  | 0 |
|  | O21--Ti6 | 0 |
|  | O4--Ti2  | 0 |
|  | O2--Ti4  | 0 |
|  | O11--Ti2 | 0 |
|  | O9--Ti2  | 0 |
|  | O7--Ti4  | 0 |
|  | O5--Ti4  | 0 |
|  | O15--Ti7 | 0 |
|  | O17--Ti7 | 0 |
|  | O13--Ti7 | 0 |
|  | O19--Ti7 | 0 |
|  | O15--Ti4 | 0 |
|  | O13--Ti4 | 0 |
|  | O19--Ti2 | 0 |
|  | O17--Ti2 | 0 |
|  | O23--Ti5 | 0 |
|  | O20--Ti1 | 0 |
|  | O18--Ti1 | 0 |
|  | O16--Ti3 | 0 |
|  | O14--Ti3 | 0 |
|  | O22--Ti7 | 0 |
|  | O12--Ti1 | 0 |
|  | O10--Ti1 | 0 |
|  | O8--Ti3  | 0 |
|  | O6--Ti3  | 0 |
|  | O22--Ti6 | 0 |
|  | O23--Ce1 | 0 |
|  | O10--Ti5 | 0 |
|  | O8--Ti5  | 0 |
|  | O6--Ti5  | 0 |
|  | O12--Ti5 | 0 |
|  | O4--Ti1  | 0 |

|  |          |      |
|--|----------|------|
|  | O2--Ti3  | 0    |
|  | O3--Ti2  | 0    |
|  | O1--Ti4  | 0    |
|  | O21--Ti7 | 0    |
|  | O7--Ti7  | 0.01 |
|  | O11--Ti7 | 0.01 |
|  | O9--Ti7  | 0.01 |
|  | O5--Ti7  | 0.01 |
|  | O12--Ti6 | 0.01 |
|  | O8--Ti6  | 0.01 |
|  | O10--Ti6 | 0.01 |
|  | O6--Ti6  | 0.01 |
|  | O22--Ti3 | 0.01 |
|  | O22--Ti1 | 0.01 |
|  | O24--Ti1 | 0.01 |
|  | O24--Ti3 | 0.01 |
|  | O2--Ti6  | 0.01 |
|  | O4--Ti6  | 0.01 |
|  | O23--Ti2 | 0.01 |
|  | O23--Ti4 | 0.01 |
|  | O7--Ce1  | 0.01 |
|  | O9--Ce1  | 0.01 |
|  | O5--Ce1  | 0.01 |
|  | O24--Ce1 | 0.02 |
|  | O23--Ba3 | 0.05 |
|  | O23--Ba7 | 0.05 |
|  | O23--Ba5 | 0.05 |
|  | O23--Ba1 | 0.05 |
|  | O3--Ba5  | 0.05 |
|  | O3--Ba3  | 0.05 |
|  | O1--Ba7  | 0.05 |
|  | O3--Ba1  | 0.05 |
|  | O1--Ba3  | 0.05 |
|  | O1--Ba1  | 0.05 |
|  | O3--Ba7  | 0.05 |
|  | O1--Ba5  | 0.05 |
|  | O12--Ba2 | 0.05 |
|  | O10--Ba4 | 0.05 |
|  | O8--Ba8  | 0.05 |
|  | O6--Ba6  | 0.05 |
|  | O12--Ba6 | 0.05 |
|  | O10--Ba8 | 0.05 |
|  | O8--Ba2  | 0.05 |



|  |          |      |
|--|----------|------|
|  | O6--Ba4  | 0.05 |
|  | O20--Ba5 | 0.05 |
|  | O20--Ba3 | 0.05 |
|  | O14--Ba7 | 0.05 |
|  | O14--Ba3 | 0.05 |
|  | O18--Ba7 | 0.05 |
|  | O18--Ba1 | 0.05 |
|  | O16--Ba5 | 0.05 |
|  | O16--Ba1 | 0.05 |
|  | O24--Ba6 | 0.05 |
|  | O24--Ba8 | 0.05 |
|  | O24--Ba4 | 0.05 |
|  | O24--Ba2 | 0.05 |
|  | O4--Ba6  | 0.05 |
|  | O4--Ba4  | 0.05 |
|  | O2--Ba6  | 0.05 |
|  | O4--Ba8  | 0.05 |
|  | O4--Ba2  | 0.05 |
|  | O2--Ba8  | 0.05 |
|  | O2--Ba4  | 0.05 |
|  | O2--Ba2  | 0.05 |
|  | O20--Ba4 | 0.06 |
|  | O18--Ba8 | 0.06 |
|  | O16--Ba6 | 0.06 |
|  | O16--Ba2 | 0.06 |
|  | O14--Ba8 | 0.06 |
|  | O14--Ba4 | 0.06 |
|  | O20--Ba6 | 0.06 |
|  | O18--Ba2 | 0.06 |
|  | O21--Ba7 | 0.06 |
|  | O21--Ba5 | 0.06 |
|  | O21--Ba3 | 0.06 |
|  | O21--Ba1 | 0.06 |
|  | O11--Ba5 | 0.06 |
|  | O9--Ba3  | 0.06 |
|  | O7--Ba7  | 0.06 |
|  | O5--Ba3  | 0.06 |
|  | O11--Ba1 | 0.06 |
|  | O9--Ba7  | 0.06 |
|  | O7--Ba1  | 0.06 |
|  | O5--Ba5  | 0.06 |
|  | O19--Ba5 | 0.06 |
|  | O13--Ba7 | 0.06 |

|  |          |      |
|--|----------|------|
|  | O19--Ba3 | 0.06 |
|  | O13--Ba3 | 0.06 |
|  | O17--Ba7 | 0.06 |
|  | O17--Ba1 | 0.06 |
|  | O15--Ba5 | 0.06 |
|  | O15--Ba1 | 0.06 |
|  | O11--Ba2 | 0.06 |
|  | O7--Ba8  | 0.06 |
|  | O11--Ba6 | 0.06 |
|  | O9--Ba4  | 0.06 |
|  | O7--Ba2  | 0.06 |
|  | O5--Ba6  | 0.06 |
|  | O9--Ba8  | 0.06 |
|  | O5--Ba4  | 0.06 |
|  | O17--Ba8 | 0.06 |
|  | O15--Ba6 | 0.06 |
|  | O19--Ba6 | 0.06 |
|  | O19--Ba4 | 0.06 |
|  | O17--Ba2 | 0.06 |
|  | O15--Ba2 | 0.06 |
|  | O13--Ba8 | 0.06 |
|  | O13--Ba4 | 0.06 |
|  | O10--Ba3 | 0.06 |
|  | O6--Ba3  | 0.06 |
|  | O12--Ba5 | 0.06 |
|  | O12--Ba1 | 0.06 |
|  | O10--Ba7 | 0.06 |
|  | O8--Ba7  | 0.06 |
|  | O6--Ba5  | 0.06 |
|  | O8--Ba1  | 0.06 |
|  | O22--Ba8 | 0.06 |
|  | O22--Ba4 | 0.06 |
|  | O22--Ba6 | 0.06 |
|  | O22--Ba2 | 0.06 |
|  | O3--Ti4  | 0.19 |
|  | O1--Ti2  | 0.19 |
|  | O23--Ti7 | 0.2  |
|  | O4--Ti3  | 0.28 |
|  | O2--Ti1  | 0.28 |
|  | O24--Ti6 | 0.3  |
|  | O21--Ce1 | 0.48 |
|  | O22--Ti5 | 0.49 |
|  | O11--Ti3 | 0.52 |

|  |          |       |
|--|----------|-------|
|  | O9--Ti3  | 0.52  |
|  | O7--Ti1  | 0.52  |
|  | O5--Ti1  | 0.52  |
|  | O22--Ce1 | 0.52  |
|  | O15--Ti5 | 0.53  |
|  | O19--Ti5 | 0.53  |
|  | O17--Ti5 | 0.53  |
|  | O13--Ti5 | 0.53  |
|  | O12--Ti4 | 0.54  |
|  | O10--Ti4 | 0.54  |
|  | O8--Ti2  | 0.54  |
|  | O6--Ti2  | 0.54  |
|  | O16--Ce1 | 0.54  |
|  | O20--Ce1 | 0.54  |
|  | O18--Ce1 | 0.54  |
|  | O14--Ce1 | 0.54  |
|  | O18--Ti4 | 0.55  |
|  | O16--Ti2 | 0.55  |
|  | O14--Ti2 | 0.55  |
|  | O20--Ti4 | 0.55  |
|  | O7--Ti6  | 0.56  |
|  | O9--Ti6  | 0.56  |
|  | O11--Ti6 | 0.56  |
|  | O5--Ti6  | 0.56  |
|  | O21--Ti5 | 0.57  |
|  | O8--Ti7  | 0.57  |
|  | O12--Ti7 | 0.57  |
|  | O10--Ti7 | 0.57  |
|  | O6--Ti7  | 0.57  |
|  | O17--Ti3 | 0.57  |
|  | O15--Ti1 | 0.57  |
|  | O13--Ti1 | 0.57  |
|  | O19--Ti3 | 0.57  |
|  | O24--Ti7 | 0.68  |
|  | O23--Ti6 | 0.7   |
|  | O3--Ti3  | 0.72  |
|  | O1--Ti1  | 0.72  |
|  | O4--Ti4  | 0.72  |
|  | O2--Ti2  | 0.72  |
|  | O20--Ba1 | -0.12 |
|  | O18--Ba5 | -0.12 |
|  | O16--Ba7 | -0.12 |
|  | O14--Ba1 | -0.12 |

|  |          |       |
|--|----------|-------|
|  | O20--Ba7 | -0.12 |
|  | O18--Ba3 | -0.12 |
|  | O16--Ba3 | -0.12 |
|  | O14--Ba5 | -0.12 |
|  | O11--Ba8 | -0.11 |
|  | O9--Ba6  | -0.11 |
|  | O7--Ba4  | -0.11 |
|  | O5--Ba2  | -0.11 |
|  | O11--Ba4 | -0.11 |
|  | O9--Ba2  | -0.11 |
|  | O7--Ba6  | -0.11 |
|  | O5--Ba8  | -0.11 |
|  | O19--Ba8 | -0.1  |
|  | O17--Ba4 | -0.1  |
|  | O15--Ba4 | -0.1  |
|  | O13--Ba6 | -0.1  |
|  | O19--Ba2 | -0.1  |
|  | O17--Ba6 | -0.1  |
|  | O15--Ba8 | -0.1  |
|  | O13--Ba2 | -0.1  |
|  | O20--Ba8 | -0.09 |
|  | O18--Ba4 | -0.09 |
|  | O16--Ba4 | -0.09 |
|  | O14--Ba6 | -0.09 |
|  | O20--Ba2 | -0.09 |
|  | O18--Ba6 | -0.09 |
|  | O16--Ba8 | -0.09 |
|  | O14--Ba2 | -0.09 |
|  | O21--Ba4 | -0.09 |
|  | O21--Ba8 | -0.09 |
|  | O21--Ba6 | -0.09 |
|  | O21--Ba2 | -0.09 |
|  | O10--Ba5 | -0.09 |
|  | O8--Ba3  | -0.09 |
|  | O12--Ba3 | -0.09 |
|  | O6--Ba7  | -0.09 |
|  | O12--Ba7 | -0.09 |
|  | O6--Ba1  | -0.09 |
|  | O10--Ba1 | -0.09 |
|  | O8--Ba5  | -0.09 |
|  | O22--Ba7 | -0.08 |
|  | O22--Ba3 | -0.08 |
|  | O22--Ba1 | -0.08 |

|  |          |       |
|--|----------|-------|
|  | O22--Ba5 | -0.08 |
|  | O24--Ba3 | -0.07 |
|  | O24--Ba5 | -0.07 |
|  | O24--Ba7 | -0.07 |
|  | O24--Ba1 | -0.07 |
|  | O19--Ba1 | -0.06 |
|  | O17--Ba5 | -0.06 |
|  | O15--Ba7 | -0.06 |
|  | O13--Ba1 | -0.06 |
|  | O19--Ba7 | -0.06 |
|  | O17--Ba3 | -0.06 |
|  | O15--Ba3 | -0.06 |
|  | O13--Ba5 | -0.06 |
|  | O4--Ba5  | -0.06 |
|  | O4--Ba3  | -0.06 |
|  | O2--Ba7  | -0.06 |
|  | O2--Ba1  | -0.06 |
|  | O2--Ba3  | -0.06 |
|  | O4--Ba1  | -0.06 |
|  | O2--Ba5  | -0.06 |
|  | O4--Ba7  | -0.06 |
|  | O9--Ba5  | -0.05 |
|  | O7--Ba3  | -0.05 |
|  | O11--Ba3 | -0.05 |
|  | O5--Ba7  | -0.05 |
|  | O11--Ba7 | -0.05 |
|  | O5--Ba1  | -0.05 |
|  | O9--Ba1  | -0.05 |
|  | O7--Ba5  | -0.05 |
|  | O23--Ba6 | -0.04 |
|  | O23--Ba4 | -0.04 |
|  | O23--Ba2 | -0.04 |
|  | O23--Ba8 | -0.04 |
|  | O3--Ba4  | -0.04 |
|  | O1--Ba6  | -0.04 |
|  | O3--Ba6  | -0.04 |
|  | O1--Ba2  | -0.04 |
|  | O3--Ba8  | -0.04 |
|  | O1--Ba4  | -0.04 |
|  | O3--Ba2  | -0.04 |
|  | O1--Ba8  | -0.04 |
|  | O12--Ba8 | -0.04 |
|  | O10--Ba6 | -0.04 |

|  |          |       |
|--|----------|-------|
|  | O8--Ba4  | -0.04 |
|  | O6--Ba2  | -0.04 |
|  | O12--Ba4 | -0.04 |
|  | O10--Ba2 | -0.04 |
|  | O8--Ba6  | -0.04 |
|  | O6--Ba8  | -0.04 |
|  | O4--Ce1  | -0.04 |
|  | O2--Ce1  | -0.04 |
|  | O8--Ce1  | -0.04 |
|  | O12--Ce1 | -0.04 |
|  | O10--Ce1 | -0.04 |
|  | O6--Ce1  | -0.04 |
|  | O3--Ce1  | -0.02 |
|  | O1--Ce1  | -0.02 |
|  | O21--Ti3 | -0.01 |
|  | O21--Ti1 | -0.01 |
|  | O1--Ti6  | -0.01 |
|  | O3--Ti6  | -0.01 |
|  | O23--Ti1 | -0.01 |
|  | O23--Ti3 | -0.01 |
|  | O2--Ti7  | -0.01 |
|  | O4--Ti7  | -0.01 |
|  | O24--Ti2 | -0.01 |
|  | O24--Ti4 | -0.01 |
|  | O3--Ti5  | -0.01 |
|  | O1--Ti5  | -0.01 |
|  | O22--Ti4 | -0.01 |
|  | O22--Ti2 | -0.01 |
|  | O20--Ti2 | -0.01 |
|  | O18--Ti2 | -0.01 |
|  | O16--Ti4 | -0.01 |
|  | O14--Ti4 | -0.01 |
|  | O15--Ce1 | -0.01 |
|  | O19--Ce1 | -0.01 |
|  | O17--Ce1 | -0.01 |
|  | O13--Ce1 | -0.01 |
|  | O24--Ti5 | -0.01 |
|  | O20--Ti3 | 0     |
|  | O18--Ti3 | 0     |
|  | O16--Ti1 | 0     |
|  | O14--Ti1 | 0     |
|  | O19--Ti4 | 0     |
|  | O17--Ti4 | 0     |

|  |          |   |
|--|----------|---|
|  | O15--Ti2 | 0 |
|  | O13--Ti2 | 0 |
|  | O11--Ti4 | 0 |
|  | O9--Ti4  | 0 |
|  | O7--Ti2  | 0 |
|  | O5--Ti2  | 0 |
|  | O18--Ti7 | 0 |
|  | O16--Ti7 | 0 |
|  | O14--Ti7 | 0 |
|  | O20--Ti7 | 0 |
|  | O8--Ti4  | 0 |
|  | O12--Ti2 | 0 |
|  | O10--Ti2 | 0 |
|  | O6--Ti4  | 0 |
|  | O15--Ti6 | 0 |
|  | O17--Ti6 | 0 |
|  | O13--Ti6 | 0 |
|  | O19--Ti6 | 0 |
|  | O9--Ti1  | 0 |
|  | O7--Ti3  | 0 |
|  | O11--Ti1 | 0 |
|  | O5--Ti3  | 0 |
|  | O7--Ti5  | 0 |
|  | O11--Ti5 | 0 |
|  | O5--Ti5  | 0 |
|  | O9--Ti5  | 0 |
|  | O15--Ti3 | 0 |
|  | O13--Ti3 | 0 |
|  | O19--Ti1 | 0 |
|  | O17--Ti1 | 0 |
|  | O12--Ti3 | 0 |
|  | O10--Ti3 | 0 |
|  | O8--Ti1  | 0 |
|  | O6--Ti1  | 0 |
|  | O4--Ti5  | 0 |
|  | O2--Ti5  | 0 |
|  | O16--Ti5 | 0 |
|  | O20--Ti5 | 0 |
|  | O18--Ti5 | 0 |
|  | O14--Ti5 | 0 |
|  | O1--Ti7  | 0 |
|  | O3--Ti7  | 0 |
|  | O21--Ti4 | 0 |

|  |          |   |
|--|----------|---|
|  | O21--Ti2 | 0 |
|  | O16--Ti6 | 0 |
|  | O14--Ti6 | 0 |
|  | O18--Ti6 | 0 |
|  | O20--Ti6 | 0 |
|  | O3--Ti1  | 0 |
|  | O1--Ti3  | 0 |
|  | O21--Ti6 | 0 |
|  | O4--Ti2  | 0 |
|  | O2--Ti4  | 0 |
|  | O11--Ti2 | 0 |
|  | O9--Ti2  | 0 |
|  | O7--Ti4  | 0 |
|  | O5--Ti4  | 0 |
|  | O15--Ti7 | 0 |
|  | O17--Ti7 | 0 |
|  | O13--Ti7 | 0 |
|  | O19--Ti7 | 0 |
|  | O15--Ti4 | 0 |
|  | O13--Ti4 | 0 |
|  | O19--Ti2 | 0 |
|  | O17--Ti2 | 0 |
|  | O23--Ti5 | 0 |
|  | O20--Ti1 | 0 |
|  | O18--Ti1 | 0 |
|  | O16--Ti3 | 0 |
|  | O14--Ti3 | 0 |
|  | O22--Ti7 | 0 |
|  | O12--Ti1 | 0 |
|  | O10--Ti1 | 0 |
|  | O8--Ti3  | 0 |
|  | O6--Ti3  | 0 |
|  | O22--Ti6 | 0 |
|  | O23--Ce1 | 0 |
|  | O10--Ti5 | 0 |
|  | O8--Ti5  | 0 |
|  | O6--Ti5  | 0 |
|  | O12--Ti5 | 0 |
|  | O4--Ti1  | 0 |
|  | O2--Ti3  | 0 |
|  | O3--Ti2  | 0 |
|  | O1--Ti4  | 0 |
|  | O21--Ti7 | 0 |



|  |          |      |
|--|----------|------|
|  | O7--Ti7  | 0.01 |
|  | O11--Ti7 | 0.01 |
|  | O9--Ti7  | 0.01 |
|  | O5--Ti7  | 0.01 |
|  | O12--Ti6 | 0.01 |
|  | O8--Ti6  | 0.01 |
|  | O10--Ti6 | 0.01 |
|  | O6--Ti6  | 0.01 |
|  | O22--Ti3 | 0.01 |
|  | O22--Ti1 | 0.01 |
|  | O24--Ti1 | 0.01 |
|  | O24--Ti3 | 0.01 |
|  | O2--Ti6  | 0.01 |
|  | O4--Ti6  | 0.01 |
|  | O23--Ti2 | 0.01 |
|  | O23--Ti4 | 0.01 |
|  | O7--Ce1  | 0.01 |
|  | O9--Ce1  | 0.01 |
|  | O5--Ce1  | 0.01 |
|  | O24--Ce1 | 0.02 |
|  | O23--Ba3 | 0.05 |
|  | O23--Ba7 | 0.05 |
|  | O23--Ba5 | 0.05 |
|  | O23--Ba1 | 0.05 |
|  | O3--Ba5  | 0.05 |
|  | O3--Ba3  | 0.05 |
|  | O1--Ba7  | 0.05 |
|  | O3--Ba1  | 0.05 |
|  | O1--Ba3  | 0.05 |
|  | O1--Ba1  | 0.05 |
|  | O3--Ba7  | 0.05 |
|  | O1--Ba5  | 0.05 |
|  | O12--Ba2 | 0.05 |
|  | O10--Ba4 | 0.05 |
|  | O8--Ba8  | 0.05 |
|  | O6--Ba6  | 0.05 |
|  | O12--Ba6 | 0.05 |
|  | O10--Ba8 | 0.05 |
|  | O8--Ba2  | 0.05 |
|  | O6--Ba4  | 0.05 |
|  | O20--Ba5 | 0.05 |
|  | O20--Ba3 | 0.05 |
|  | O14--Ba7 | 0.05 |

|  |          |      |
|--|----------|------|
|  | O14--Ba3 | 0.05 |
|  | O18--Ba7 | 0.05 |
|  | O18--Ba1 | 0.05 |
|  | O16--Ba5 | 0.05 |
|  | O16--Ba1 | 0.05 |
|  | O24--Ba6 | 0.05 |
|  | O24--Ba8 | 0.05 |
|  | O24--Ba4 | 0.05 |
|  | O24--Ba2 | 0.05 |
|  | O4--Ba6  | 0.05 |
|  | O4--Ba4  | 0.05 |
|  | O2--Ba6  | 0.05 |
|  | O4--Ba8  | 0.05 |
|  | O4--Ba2  | 0.05 |
|  | O2--Ba8  | 0.05 |
|  | O2--Ba4  | 0.05 |
|  | O2--Ba2  | 0.05 |
|  | O20--Ba4 | 0.06 |
|  | O18--Ba8 | 0.06 |
|  | O16--Ba6 | 0.06 |
|  | O16--Ba2 | 0.06 |
|  | O14--Ba8 | 0.06 |
|  | O14--Ba4 | 0.06 |
|  | O20--Ba6 | 0.06 |
|  | O18--Ba2 | 0.06 |
|  | O21--Ba7 | 0.06 |
|  | O21--Ba5 | 0.06 |
|  | O21--Ba3 | 0.06 |
|  | O21--Ba1 | 0.06 |
|  | O11--Ba5 | 0.06 |
|  | O9--Ba3  | 0.06 |
|  | O7--Ba7  | 0.06 |
|  | O5--Ba3  | 0.06 |
|  | O11--Ba1 | 0.06 |
|  | O9--Ba7  | 0.06 |
|  | O7--Ba1  | 0.06 |
|  | O5--Ba5  | 0.06 |
|  | O19--Ba5 | 0.06 |
|  | O13--Ba7 | 0.06 |
|  | O19--Ba3 | 0.06 |
|  | O13--Ba3 | 0.06 |
|  | O17--Ba7 | 0.06 |
|  | O17--Ba1 | 0.06 |

|  |          |      |
|--|----------|------|
|  | O15--Ba5 | 0.06 |
|  | O15--Ba1 | 0.06 |
|  | O11--Ba2 | 0.06 |
|  | O7--Ba8  | 0.06 |
|  | O11--Ba6 | 0.06 |
|  | O9--Ba4  | 0.06 |
|  | O7--Ba2  | 0.06 |
|  | O5--Ba6  | 0.06 |
|  | O9--Ba8  | 0.06 |
|  | O5--Ba4  | 0.06 |
|  | O17--Ba8 | 0.06 |
|  | O15--Ba6 | 0.06 |
|  | O19--Ba6 | 0.06 |
|  | O19--Ba4 | 0.06 |
|  | O17--Ba2 | 0.06 |
|  | O15--Ba2 | 0.06 |
|  | O13--Ba8 | 0.06 |
|  | O13--Ba4 | 0.06 |
|  | O10--Ba3 | 0.06 |
|  | O6--Ba3  | 0.06 |
|  | O12--Ba5 | 0.06 |
|  | O12--Ba1 | 0.06 |
|  | O10--Ba7 | 0.06 |
|  | O8--Ba7  | 0.06 |
|  | O6--Ba5  | 0.06 |
|  | O8--Ba1  | 0.06 |
|  | O22--Ba8 | 0.06 |
|  | O22--Ba4 | 0.06 |
|  | O22--Ba6 | 0.06 |
|  | O22--Ba2 | 0.06 |
|  | O3--Ti4  | 0.19 |
|  | O1--Ti2  | 0.19 |
|  | O23--Ti7 | 0.2  |
|  | O4--Ti3  | 0.28 |
|  | O2--Ti1  | 0.28 |
|  | O24--Ti6 | 0.3  |
|  | O21--Ce1 | 0.48 |
|  | O22--Ti5 | 0.49 |
|  | O11--Ti3 | 0.52 |
|  | O9--Ti3  | 0.52 |
|  | O7--Ti1  | 0.52 |
|  | O5--Ti1  | 0.52 |
|  | O22--Ce1 | 0.52 |

|  |          |      |
|--|----------|------|
|  | O15--Ti5 | 0.53 |
|  | O19--Ti5 | 0.53 |
|  | O17--Ti5 | 0.53 |
|  | O13--Ti5 | 0.53 |
|  | O12--Ti4 | 0.54 |
|  | O10--Ti4 | 0.54 |
|  | O8--Ti2  | 0.54 |
|  | O6--Ti2  | 0.54 |
|  | O16--Ce1 | 0.54 |
|  | O20--Ce1 | 0.54 |
|  | O18--Ce1 | 0.54 |
|  | O14--Ce1 | 0.54 |
|  | O18--Ti4 | 0.55 |
|  | O16--Ti2 | 0.55 |
|  | O14--Ti2 | 0.55 |
|  | O20--Ti4 | 0.55 |
|  | O7--Ti6  | 0.56 |
|  | O9--Ti6  | 0.56 |
|  | O11--Ti6 | 0.56 |
|  | O5--Ti6  | 0.56 |
|  | O21--Ti5 | 0.57 |
|  | O8--Ti7  | 0.57 |
|  | O12--Ti7 | 0.57 |
|  | O10--Ti7 | 0.57 |
|  | O6--Ti7  | 0.57 |
|  | O17--Ti3 | 0.57 |
|  | O15--Ti1 | 0.57 |
|  | O13--Ti1 | 0.57 |
|  | O19--Ti3 | 0.57 |
|  | O24--Ti7 | 0.68 |
|  | O23--Ti6 | 0.7  |
|  | O3--Ti3  | 0.72 |
|  | O1--Ti1  | 0.72 |
|  | O4--Ti4  | 0.72 |
|  | O2--Ti2  | 0.72 |
